# Supplementary material for: Nucleic Acid Mediated Activation of a Short Prokaryotic Argonaute Immune System
Source: PubMed Central journal article supplement — bioRxiv. 2023 Sep 17:2023.09.17.558117. Preprint. [Version 1] doi: 10.1101/2023.09.17.558117 (PMC10516056; doi:10.1101/2023.09.17.558117), 2023-09-17
Supplement: NIHPP2023.09.17.558117v1-supplement-1.pdf [file NIHPP2023.09.17.558117v1-supplement-1.pdf]

**Fig. S1**

**a.**

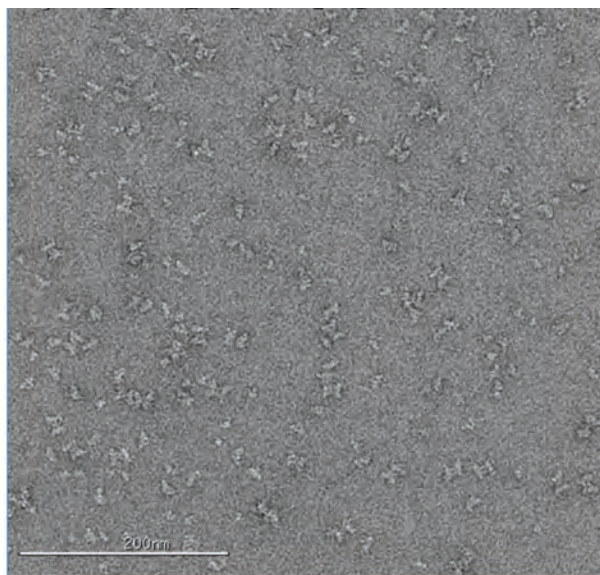

**b.**

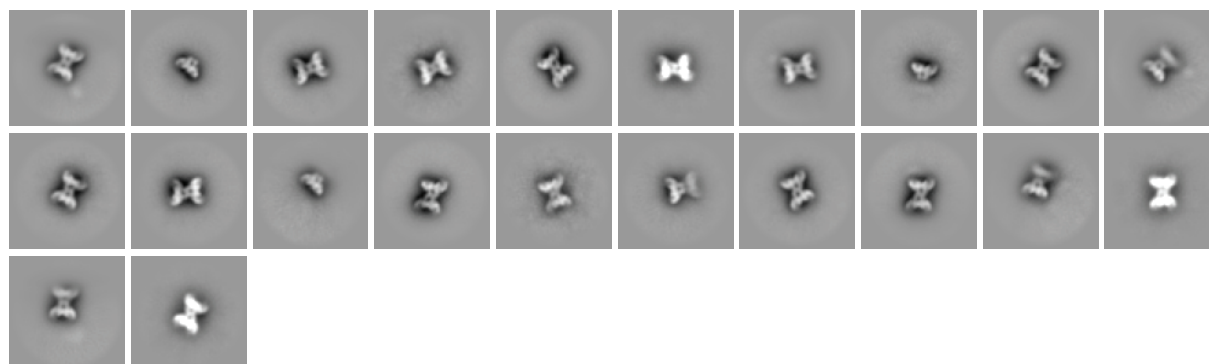

Fig. S2

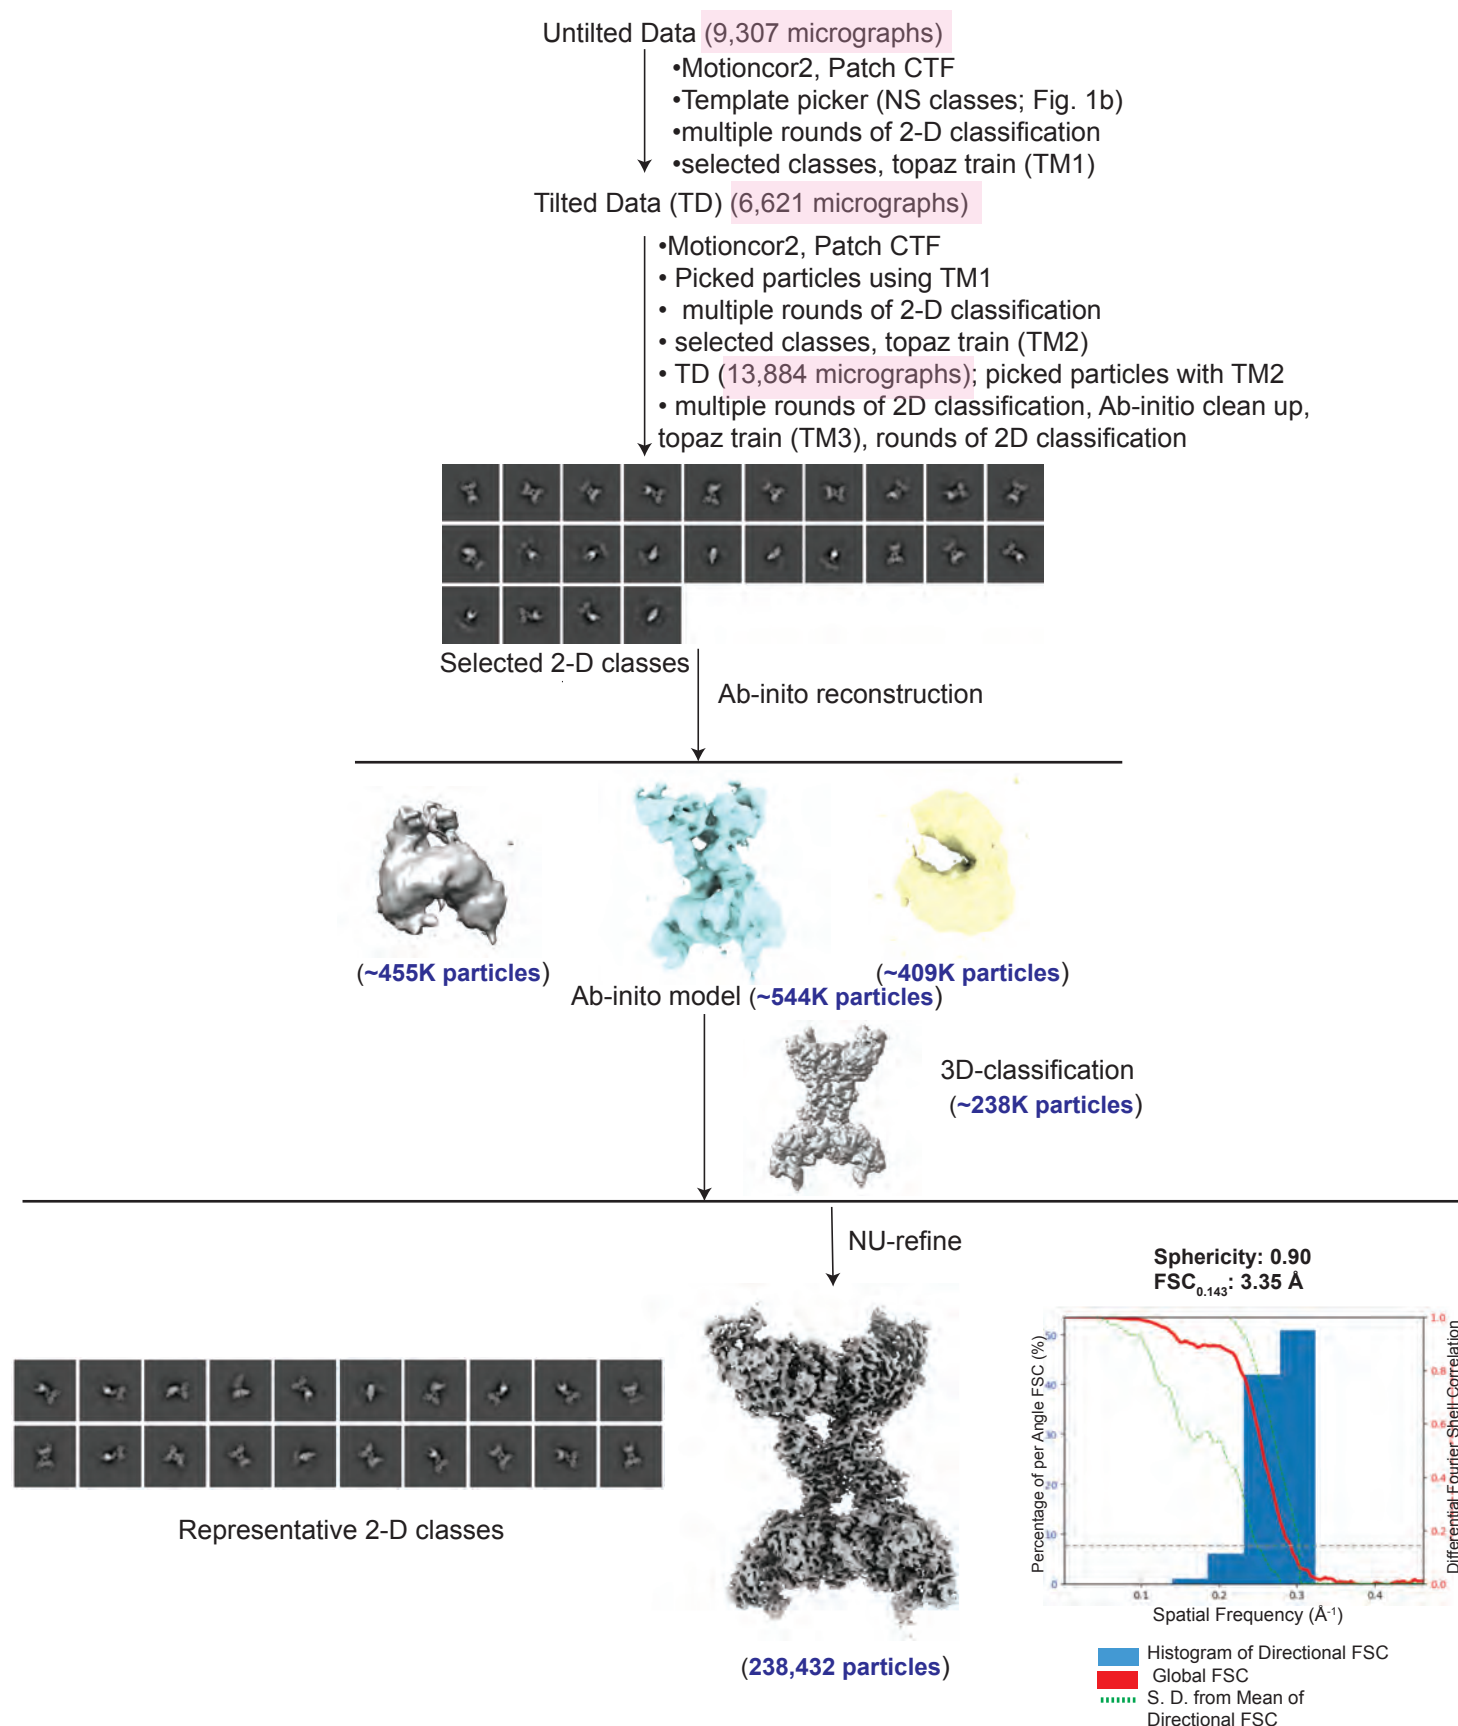

**Fig. S3**

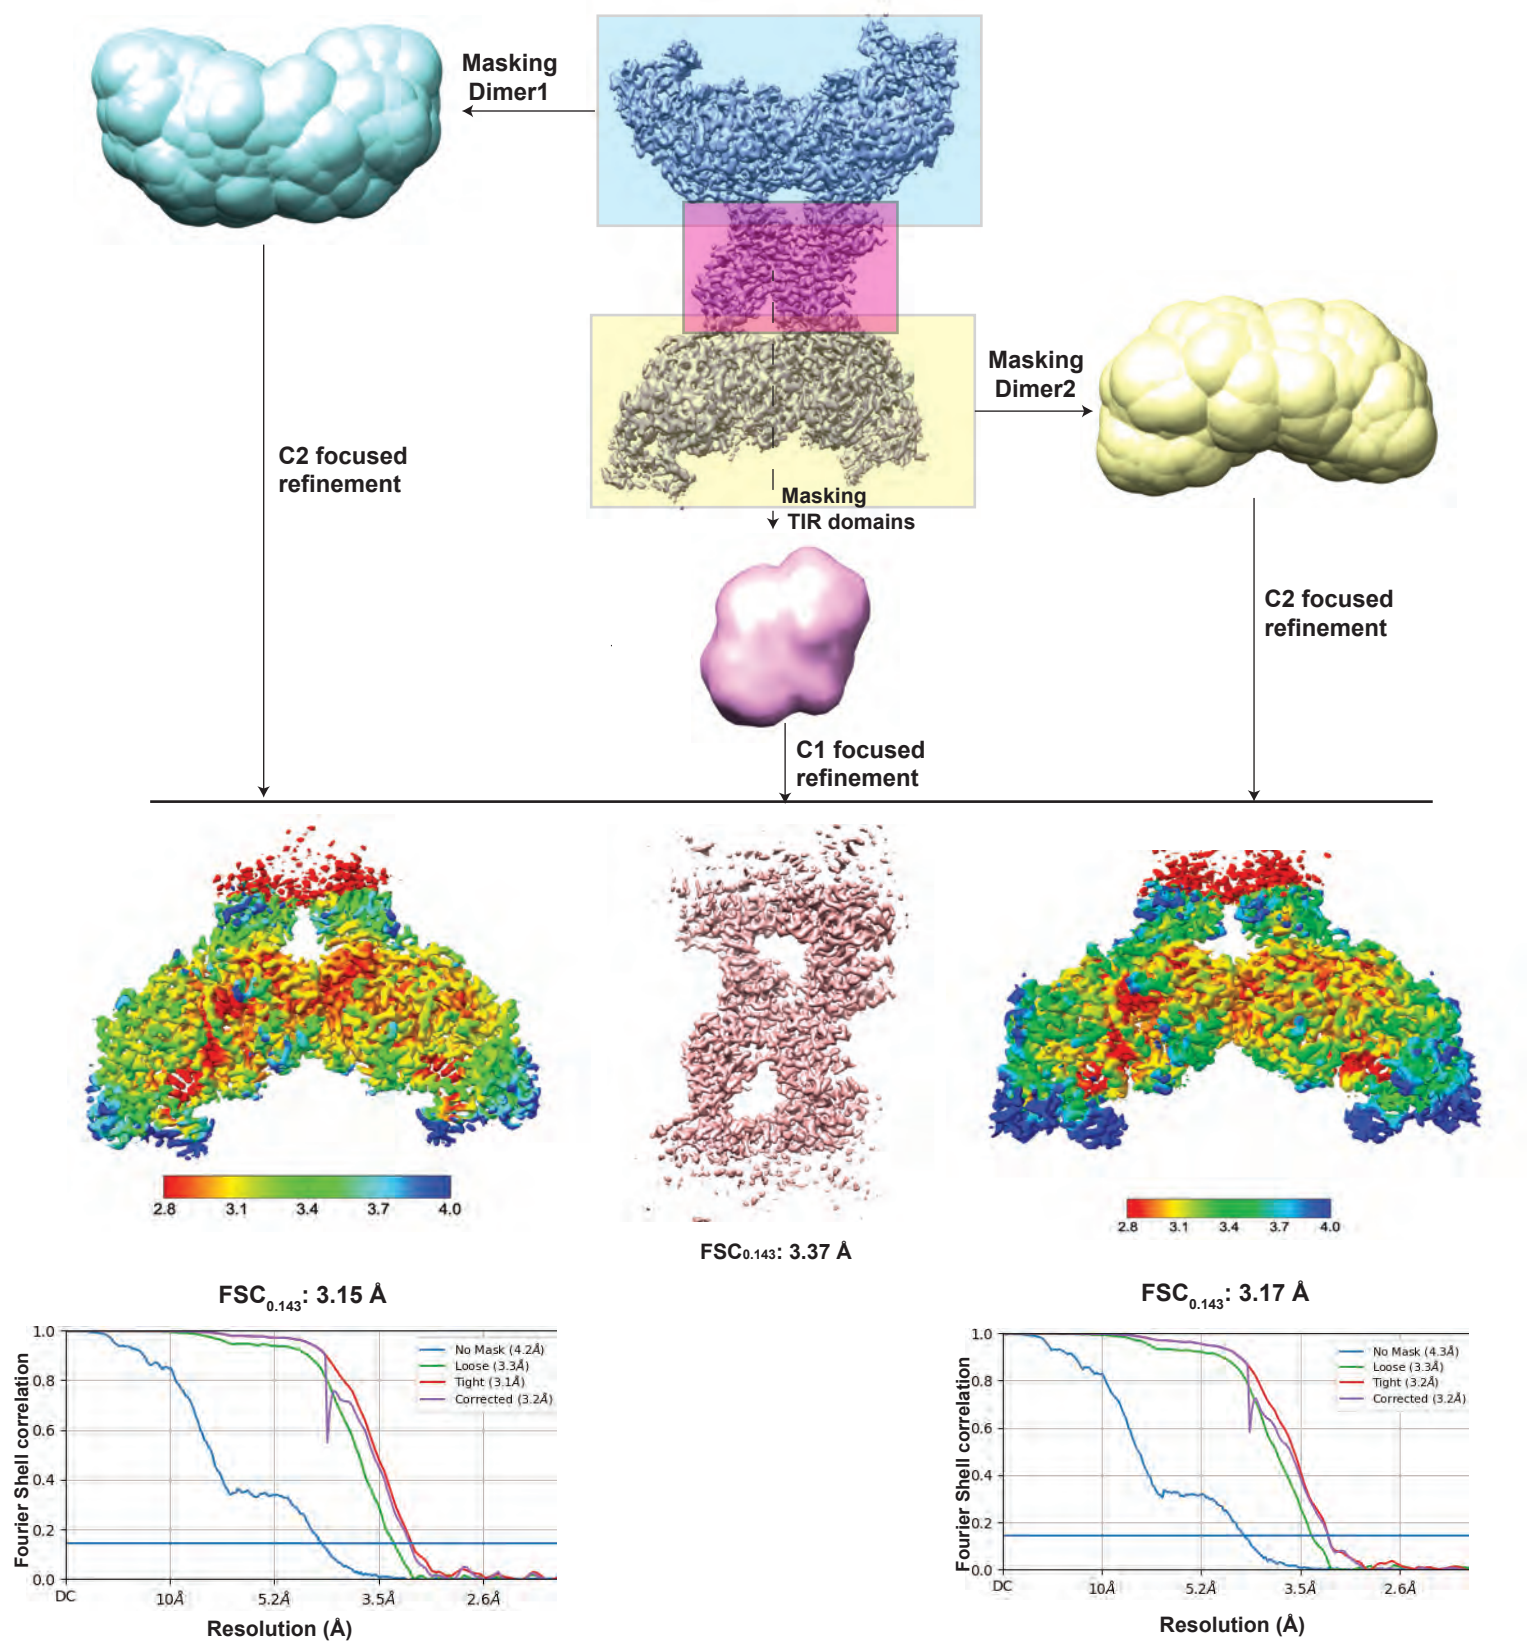

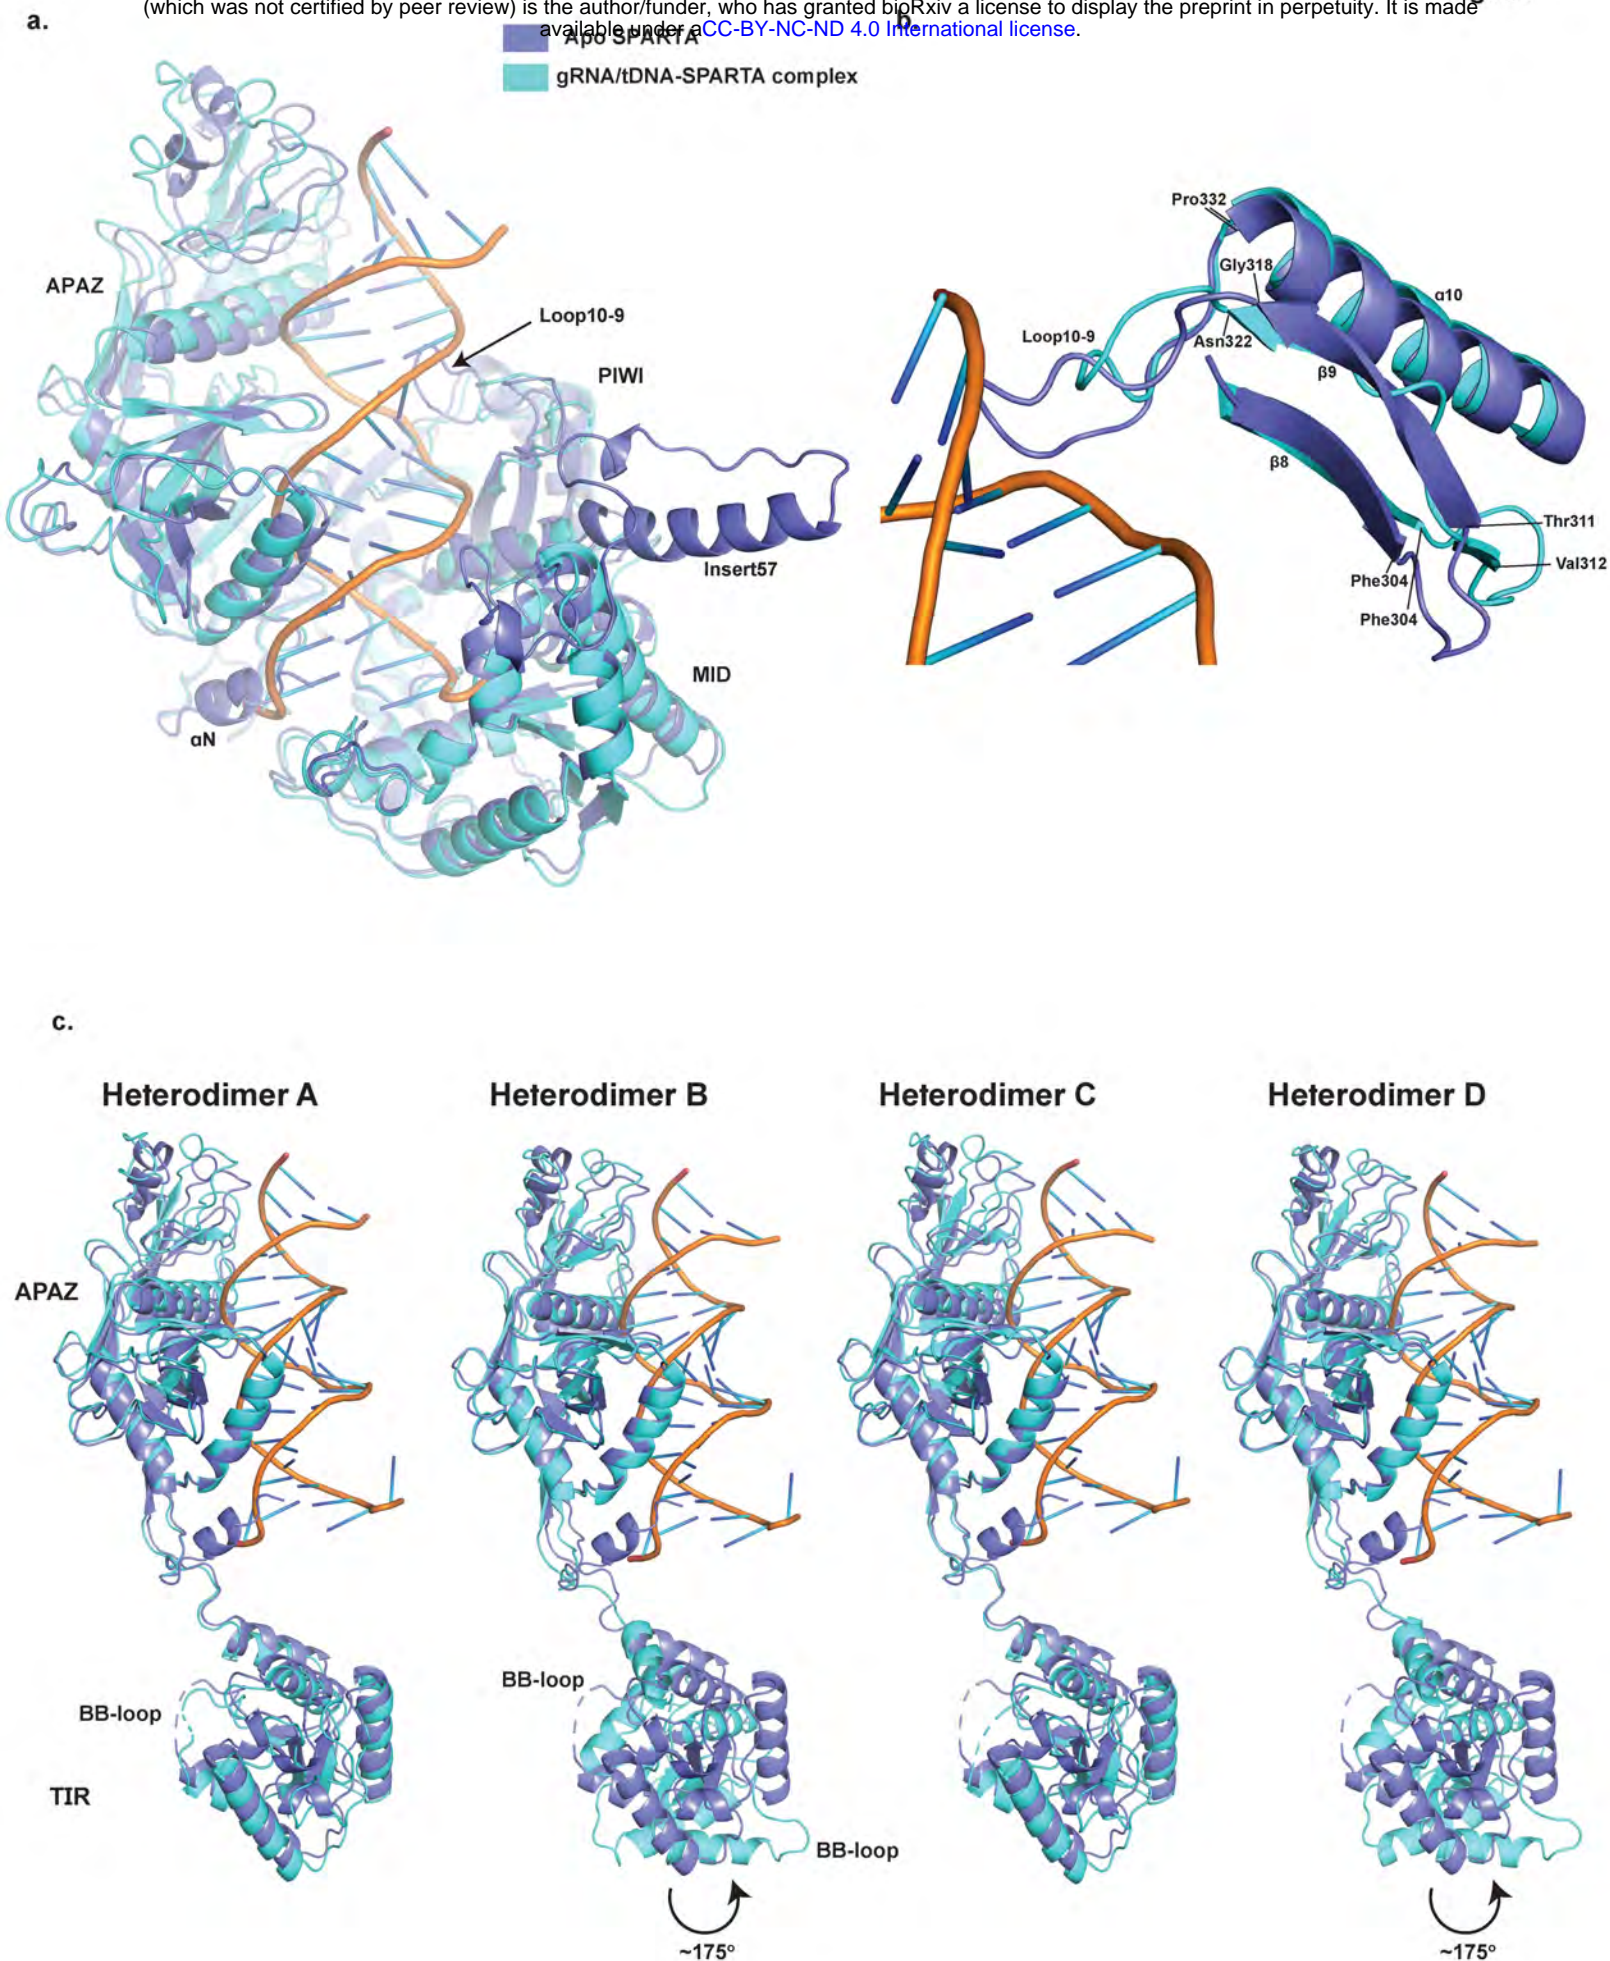

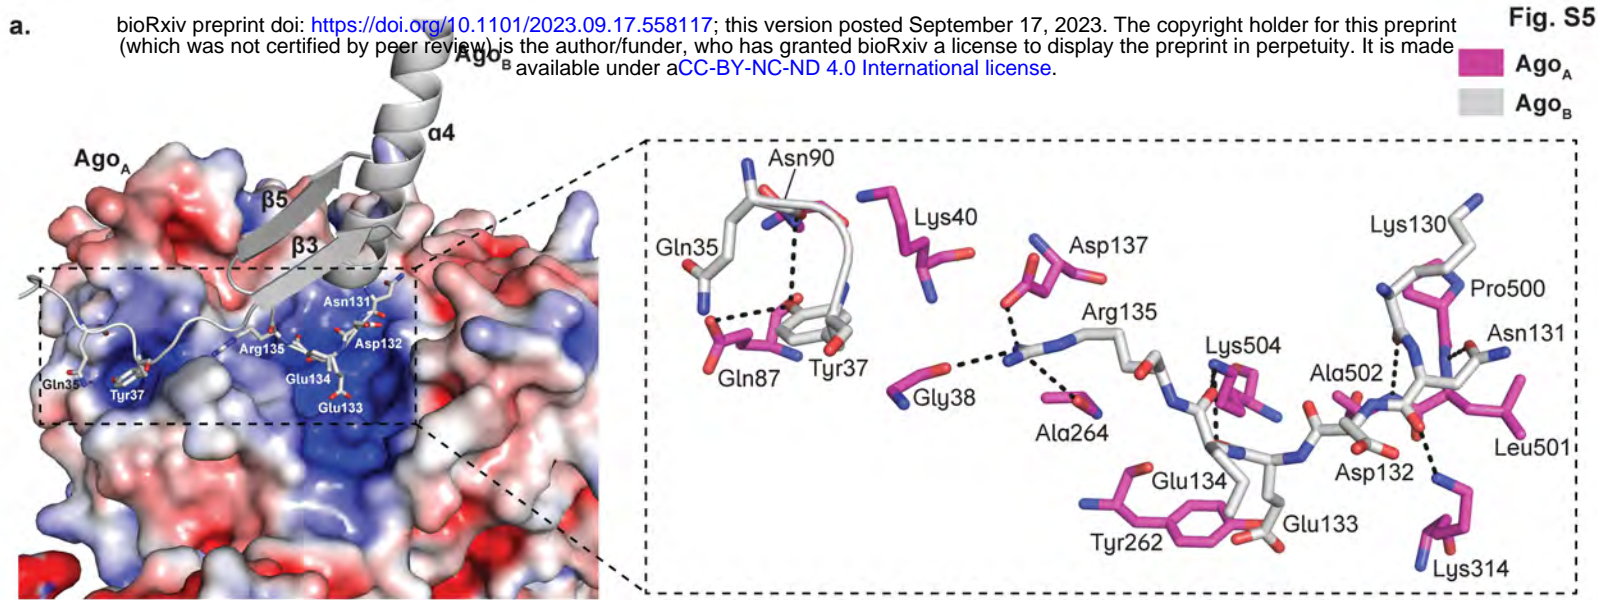

**b.**

■ Apo SPARTA  
■ gRNA/tDNA-SPARTA complex

Apo SPARTA

gRNA/tDNA-SPARTA complex

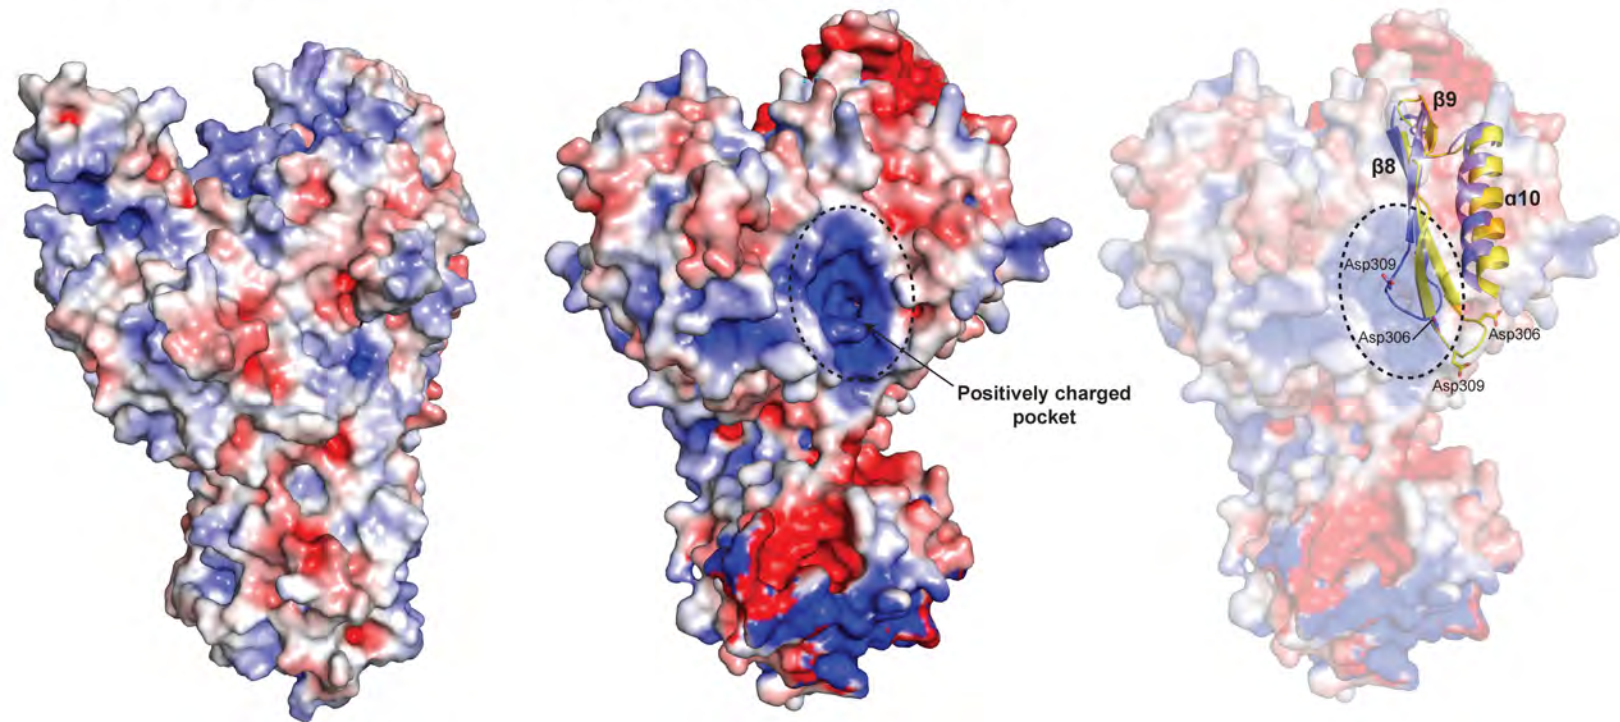

| Apo-SPARTA (PDB: 8U7B)                               |                             |
|------------------------------------------------------|-----------------------------|
| <b>Data collection</b>                               |                             |
| Space group                                          | P6 <sub>5</sub> 22          |
| Cell dimensions                                      |                             |
| <i>a</i> , <i>b</i> , <i>c</i> (Å)                   | 197.18 Å, 197.18 Å 183.4 Å, |
| $\alpha$ , $\beta$ , $\gamma$ (°)                    | 90.00 90.00 120.00          |
| Resolution (Å)                                       | 170.76-2.66 (2.99-2.66)*    |
| <i>R</i> <sub>sym</sub> or <i>R</i> <sub>merge</sub> | 14.8 (176.7)                |
| <i>R</i> <sub>pim</sub>                              | 4.2 (55.4)                  |
| No. of unique reflections                            | 40914                       |
| <i>I</i> / $\sigma$ <i>I</i>                         | 13.7 (1.7)                  |
| Completeness (%) (ellipsoidal)                       | 96.2 (73.9)                 |
| Redundancy                                           | 13.3 (10.7)                 |
| CC(1/2)                                              | 1.00 (0.57)                 |
| <b>Refinement</b>                                    |                             |
| Resolution (Å)                                       | 49.71-2.66                  |
| No. reflections                                      | 40895                       |
| <i>R</i> <sub>work</sub> / <i>R</i> <sub>free</sub>  | 18.6/24.0                   |
| No. atoms                                            |                             |
| Macromolecules                                       | 7420                        |
| Ligands/Ions                                         | 2                           |
| Water                                                | 91                          |
| <i>B</i> -factors                                    |                             |
| Macromolecules                                       | 69.0                        |
| Ligands/Ions                                         | 67.0                        |
| Water                                                | 63.9                        |
| R.m.s. deviations                                    |                             |
| Bond lengths (Å)                                     | 0.003                       |
| Bond angles (°)                                      | 0.61                        |
| Ramachandran Plot                                    |                             |
| Favored (%)                                          | 93.0                        |
| Allowed (%)                                          | 6.5                         |
| Outliers (%)                                         | 0.5                         |

**Table S2: CryoEM data collection, model refinement and validation statistics**

| SPARTA-gRNA-tDNA-Mg                                             |           |
|-----------------------------------------------------------------|-----------|
| PDB ID:8U72                                                     |           |
| EMDB IDs: EMD-41945, EMD-41947, EMD-41948, EMD-41949, EMD-41966 |           |
| <b>Data collection and processing</b>                           |           |
| Magnification (kV)                                              | x81000    |
| Voltage (kV)                                                    | 300       |
| Pixel Size (Å/pixel)                                            | 1.083     |
| Electron dose (e <sup>-</sup> /Å <sup>2</sup> )                 | 51.11     |
| Defocus range (µm)                                              | 0.8 - 2.5 |
| Number of Micrographs                                           | 13,884    |
| Tilt angle                                                      | 30°, 45°  |
| Number of particles                                             | 238,432   |
| Nominal Map resolution (Å)                                      | 3.35      |
| FSC threshold                                                   | 0.143     |
| <b>Refinement (Phenix)</b>                                      |           |
| <b>Model composition</b>                                        |           |
| Non-hydrogen atoms                                              | 29715     |
| Protein residues                                                | 3469      |
| DNA/other                                                       | 148/4     |
| <b>R.M.S. deviations</b>                                        |           |
| Bond lengths (Å)                                                | 0.003     |
| Bond Angles (°)                                                 | 0.596     |
| <b>Validation</b>                                               |           |
| Molprobity score                                                | 1.90      |
| Clashscore                                                      | 7.07      |
| Rotamer outliers (%)                                            | 0.33      |
| Cβ outliers (%)                                                 | 0.00      |
| <b>Ramachandran Statistics (%)</b>                              |           |
| Favored                                                         | 91.16     |
| Allowed                                                         | 8.78      |
| Outliers                                                        | 0.06      |
